# Supplementary material
Source: ML conference proceedings conference paper supplement (https://openaccess.thecvf.com/content/WACV2025/html/Kim_Retaining_and_Enhancing_WACV_2025_paper.html)
Supplement: Supplementary file 1 [file Kim_Retaining_and_Enhancing_WACV_2025_supplemental.pdf]

# Supplementary Material

## Retaining and Enhancing Pre-trained Knowledge in Vision-Language Models with Prompt Ensembling

Donggeun Kim<sup>1,2,\*†</sup> Yujin Jo<sup>1\*</sup> Myungjoo Lee<sup>1\*</sup> Taesup Kim<sup>1‡</sup>

<sup>1</sup>Graduate School of Data Science, Seoul National University <sup>2</sup>Nota Inc.

Table 1. Parameter comparison with other models

| Method    | Params | Params<br>% CLIP | H     |
|-----------|--------|------------------|-------|
| CoOp      | 2048   | 0.002            | 71.66 |
| CoCoOp    | 35360  | 0.03             | 75.83 |
| RPO       | 30720  | 0.02             | 77.78 |
| MaPLe     | 3.55M  | 2.85             | 78.55 |
| PromptSRC | 46K    | 0.04             | 79.97 |
| GPE       | 30720  | 0.02             | 79.24 |

The section below includes additional information, a comparison of parameter efficiency, and additional ablation studies of GPE.

### 1. Parameter Efficiency Comparison with Different Prompting Methods

Table 1 represents the number of trainable parameters and the harmonic mean on base-to-novel generalization in comparison with CoOp [6], CoCoOp [5], RPO [3], MaPLe [1], PromptSRC [2], and GPE. As shown, GPE outperforms other methods updating a similar number of parameters with a remarkable performance difference. Even when compared to MaPLe, which has a significantly larger number of learnable prompts, GPE achieves superior performance with considerably fewer parameters.

### 2. Additional Ablation Studies

**Pre-softmax vs. Post-softmax for Inference** Our investigation reveals that making predictions by the traditional ensemble method, which averages softmax-transformed logits, yields better results. In comparison with the pre-softmax approach outlined in Table 2, where logits are averaged before softmax for inference, our default method exhibits enhanced performance. This emphasizes the importance of

\*Equal contribution.

†Work done at Seoul National University.

‡Corresponding author.

Table 2. Ablation study on GPE methods

| Method                       | Base         | Novel        | H            |
|------------------------------|--------------|--------------|--------------|
| GPE                          | <b>83.26</b> | <b>75.92</b> | <b>79.24</b> |
| GPE w/ pre-softmax inference | 83.43        | 75.68        | 79.17        |
| GPE w/ centroid loss         | 81.62        | 74.76        | 78.04        |

considering the order of operations in ensemble methods, particularly when optimizing model performance.

**Covariance Regularization Effect** When applying a loss function that drives each prompt away from the centroid of all prompts, as suggested in C-TPT [4], instead of covariance loss, the performance dropped to 78.04%, as shown in Table 2.

### References

- [1] Muhammad Uzair Khattak, Hanoona Rasheed, Muhammad Maaz, Salman Khan, and Fahad Shahbaz Khan. Maple: Multi-modal prompt learning. In *Proceedings of the IEEE/CVF Conference on Computer Vision and Pattern Recognition*, pages 19113–19122, 2023. 1
- [2] Muhammad Uzair Khattak, Syed Talal Wasim, Muzammal Naseer, Salman Khan, Ming-Hsuan Yang, and Fahad Shahbaz Khan. Self-regulating prompts: Foundational model adaptation without forgetting. In *Proceedings of the IEEE/CVF International Conference on Computer Vision*, pages 15190–15200, 2023. 1
- [3] Dongjun Lee, Seokwon Song, Jihee Suh, Joonmyeong Choi, Sanghyeok Lee, and Hyunwoo J Kim. Read-only prompt optimization for vision-language few-shot learning. In *Proceedings of the IEEE/CVF International Conference on Computer Vision*, pages 1401–1411, 2023. 1
- [4] Hee Suk Yoon, Eunseop Yoon, Joshua Tian Jin Tee, Mark Hasegawa-Johnson, Yingzhen Li, and Chang D Yoo. C-tp: Calibrated test-time prompt tuning for vision-language models via text feature dispersion. *arXiv preprint arXiv:2403.14119*, 2024. 1
- [5] Kaiyang Zhou, Jingkang Yang, Chen Change Loy, and Ziwei Liu. Conditional prompt learning for vision-language models. In *Proceedings of the IEEE/CVF Conference on Computer Vision and Pattern Recognition*, pages 16816–16825, 2022. 1

- [6] Kaiyang Zhou, Jingkang Yang, Chen Change Loy, and Ziwei Liu. Learning to prompt for vision-language models. *International Journal of Computer Vision*, 130(9):2337–2348, 2022.
